# Supplementary material for: Sedentary Behaviour and Telomere Length Shortening during Early Childhood: Evidence from the Multicentre Prospective INMA Cohort Study
Source: MDPI journal article supplement (doi:10.3390/ijerph20065134), 2023-03-14
Supplement: s1 [file s1]

## **Supplementary Material**

**Methods S1. Average relative telomere length measurement using qPCR.**

**Table S1. Comparison of mother–child pair characteristics before and after participant selection for cross-sectional and longitudinal analyses.**

**Figure S1. Flow chart of participant selection.**

**Figure S2. Distribution plot of telomere length in the study participants.**

**References.**

This supplemental material has been provided by the authors to give readers additional information about their work.

## **Methods S1. Average relative telomere length measurement using qPCR.**

Average relative telomere length was measured using a modified qPCR protocol in accordance with Cawthon et al. [1] that was reported by Martens and colleagues [2]. Firstly, DNA quantity and purity was assessed using a Nanodrop 1000 spectrophotometer (Isogen, Life Science, Belgium) considering the DNA pure when the A260/280 was greater than 1.80 and A260/230 greater than 2.0. DNA integrity was assessed by agarose gel-electrophoresis. To ensure a uniform DNA input of 5 ng for each qPCR reaction, samples were diluted and checked using the Quant-iT™ PicoGreen® dsDNA Assay Kit (Life Technologies, Europe). All samples were measured in triplicates using a 7900HT Fast Real-time PCR System (Applied Biosystems) in a 384-well format. The reaction mixture used to assess telomeres contained 1x QuantiTect SYBR Green PCR master mix (Qiagen, Inc., Venlo, the Netherlands), 2 mM dithiothreitol (DTT), 300 nM telg primer (ACACTAAGGTTTGGGTTTGGGTTTGGGTTTGGGT TAGTGT), and 900 nM telc primer (TGTTAGGTATCCCTATCCCTATCCCTATCCCTATCCCTAACA). The applied cycling conditions were as follows: 1 cycle at 95°C for 10 min, 2 cycles at 94°C for 15 sec and 49°C for 2 min, and 30 cycles at 94°C for 15 sec, 62°C for 20 sec, and 74°C for 1 min and 40 sec. The single-copy gene (human  $\beta$  globin) qPCR mixture contained 1x QuantiTect SYBR Green PCR master mix, 400 nM HBG1 primer (GCTTCTGACACAACCTGTGTTCCTAGC), and 400 nM HBG2 primer (CACCAACTTCATCCACGTTCCACC). The single-copy gene used in Sabadell samples at 8 years was different and contained 1x QuantiTect SYBR Green PCR master mix, 300 nM 36B4u primer (CAGCAAGTGGGAAGGTGTAATCC), and 500 nM 36B4d primer (CCCATTCATCATCAACGG GTACAA) [3]. The same cycling conditions were used: 1 cycle at 95°C for 10 min, 40 cycles at 95°C for 15 sec, and 58°C for 1 min and 20 sec. After PCR cycling, individual qPCR curves and melt curves were visually inspected and when a run error was observed the C<sub>q</sub> value was removed from subsequent analysis. In addition, when triplicate measures showed a deviation of more than 0.3 in C<sub>q</sub> values, these were removed from subsequent analysis. In total, n= 6 samples did not meet these criteria.

**Table S1. Comparison of mother–child pair characteristics before and after participant selection for cross-sectional and longitudinal analyses.**

**Table S1.** Comparison of mother–child pair characteristics before and after participant selection for analyses at 4 years and 8 years.

| Characteristic                                         | Time <sup>a</sup>   |                         |                         |
|--------------------------------------------------------|---------------------|-------------------------|-------------------------|
|                                                        | Eligible at 4 years | Available at 4 years    | Available at 8 years    |
| Number of participants                                 | 1383                | 669                     | 530                     |
| <b>Child's characteristics at 4 years <sup>b</sup></b> |                     |                         |                         |
| Age, years, mean (SD)                                  | 4.4 (0.2)           | 4.4 (0.2)               | 4.4 (0.2)               |
| Sex, n (%)                                             |                     |                         |                         |
| Male                                                   | 713 (51.6)          | 350 (52.3)              | 276 (52.1)              |
| Female                                                 | 670 (48.4)          | 319 (47.7)              | 254 (47.9)              |
| BMI, Kg/m <sup>2</sup>                                 | 16.0 (15.2 to 17.0) | 16.0 (15.2 to 17.0)     | 16.0 (15.3 to 16.9)     |
| Missing, n (%)                                         | 5 (0.4)             | 0 (0.0)                 | 0 (0.0)                 |
| Energy intake, kcal/day                                | 1556 (1343 to 1793) | 1583 (1390 to 1820)     | 1563 (1377 to 1798)     |
| Missing, n (%)                                         | 68 (4.9)            | 0 (0.0)                 | 0 (0.0)                 |
| UPF intake, g/day                                      | 397 (284 to 552)    | 381 (279 to 554)        | 380 (277 to 552)        |
| Missing, n (%)                                         | 68 (4.9)            | 0 (0.0)                 | 0 (0.0)                 |
| Fruits and vegetables intake, g/day                    | 207 (145 to 295)    | 219 (155 to 304)        | 216 (153 to 305)        |
| Missing, n (%)                                         | 68 (4.9)            | 0 (0.0)                 | 0 (0.0)                 |
| Relative Mediterranean diet score                      | 8.0 (7.0 to 10.0)   | 9.0 (7.0 to 10.0)       | 9.0 (7.0 to 11.0)       |
| Missing, n (%)                                         | 68 (4.9)            | 0 (0.0)                 | 0 (0.0)                 |
| Extracurricular PA, MET-hr/day                         | 9.9 (7.0 to 13.1)   | 9.7 (6.8 to 12.9)       | 9.8 (7.1 to 12.9)       |
| Missing, n (%)                                         | 38 (2.7)            | 0 (0.0)                 | 0 (0.0)                 |
| Cohort, n (%)                                          |                     |                         |                         |
| Asturias                                               | 412 (29.8)          | 273 (40.8) <sup>c</sup> | 194 (36.6) <sup>c</sup> |
| Gipuzkoa                                               | 412 (29.8)          | 131 (19.6)              | 123 (23.2)              |
| Sabadell                                               | 559 (40.4)          | 265 (39.6)              | 213 (40.2)              |
| Season of blood extraction, n (%)                      |                     |                         |                         |
| Winter                                                 | 221 (16.0)          | 165 (24.7)              | 130 (24.5)              |
| Spring                                                 | 287 (20.8)          | 177 (26.5)              | 133 (25.1)              |
| Summer                                                 | 313 (22.6)          | 180 (26.9)              | 155 (29.2)              |
| Autumn                                                 | 264 (19.1)          | 147 (21.9)              | 112 (21.2)              |
| Missing                                                | 298 (21.5)          | 0 (0.0)                 | 0 (0.0)                 |
| <b>Mothers' Characteristics at 4 years</b>             |                     |                         |                         |
| Age, years, mean (SD)                                  | 36.7 (4.0)          | 37.1 (4.2)              | 37.2 (4.0)              |
| Missing, n (%)                                         | 81 (5.9)            | 0 (0.0)                 | 0 (0.0)                 |
| Country of origin, Spain, n (%)                        | 1298 (94.4)         | 626 (94.0)              | 497 (94.0)              |
| Missing, n (%)                                         | 8 (0.6)             | 3 (0.4)                 | 0 (0.0)                 |
| Periconceptional BMI, kg/m <sup>2</sup>                | 22.7 (20.8 to 25.2) | 22.9 (20.9 to 25.5)     | 22.9 (20.8 to 25.3)     |
| Missing, n (%)                                         | 13 (0.9)            | 0 (0.0)                 | 0 (0.0)                 |
| Smoking status, n (%)                                  |                     |                         |                         |
| Yes                                                    | 314 (22.7)          | 161 (24.1)              | 120 (22.6)              |
| No                                                     | 1024 (74.0)         | 500 (74.7)              | 404 (76.2)              |
| Missing                                                | 45 (3.3)            | 8 (1.2)                 | 6 (1.2)                 |
| Educational level, n (%)                               |                     |                         |                         |
| University                                             | 557 (40.3)          | 265 (39.6)              | 218 (41.1)              |
| Secondary                                              | 562 (40.6)          | 270 (40.4)              | 211 (39.8)              |
| Primary                                                | 246 (17.8)          | 131 (19.6)              | 98 (18.5)               |
| Missing                                                | 18 (1.3)            | 3 (0.4)                 | 3 (0.6)                 |

Abbreviations: hr, hour; SD, standard deviation; BMI, body mass index; UPF, ultra-processed food; PA, physical activity; MET, metabolic equivalent of task.

<sup>a</sup> Differences between sample size available at 4 years vs. eligible at 4 years and available at 8 years vs. available at 4 years were assessed using ANOVA and chi-squared tests.

<sup>b</sup> Child's and mother's characteristics presented as median (IQR, interquartile range) unless otherwise indicated.

<sup>c</sup> P value < 0.05 vs. participants eligible at 4 years.

**Figure S1. Flow chart of participant selection.**

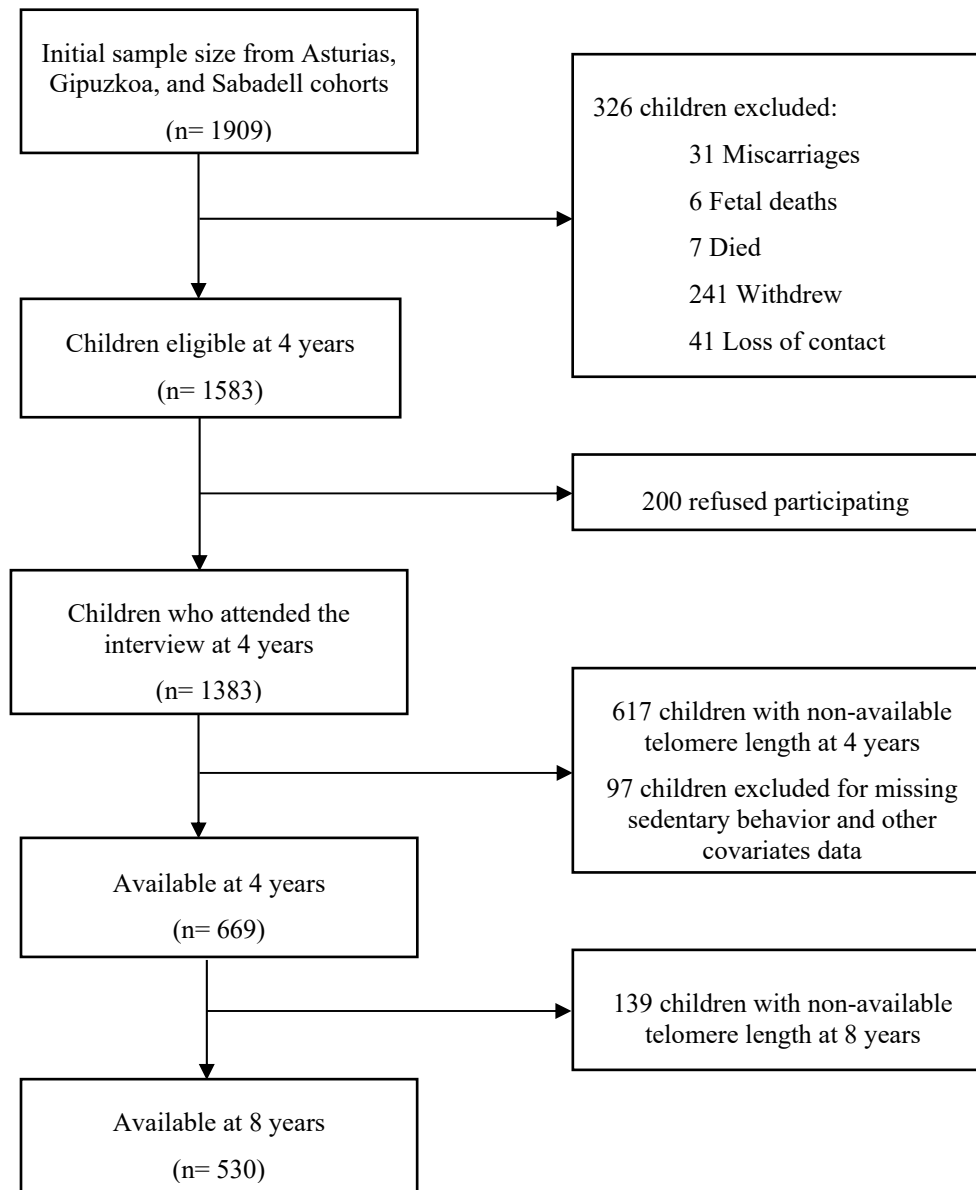

**Figure S2. Distribution plot of telomere length in the study participants**

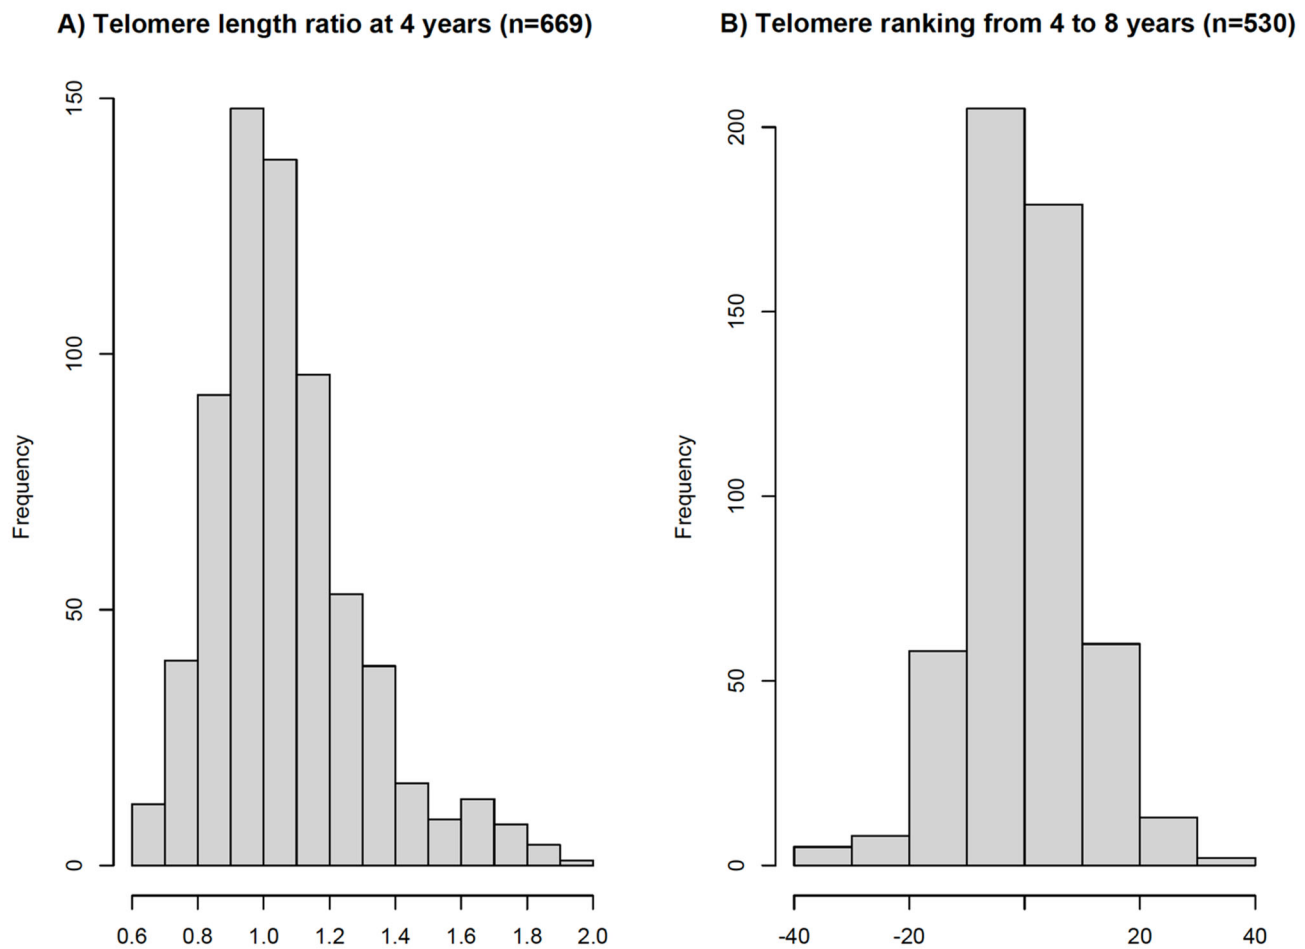

## References

1. Cawthon RM. Telomere length measurement by a novel monochrome multiplex quantitative PCR method. *Nucleic Acids Res.* (2009)37(3):e21. doi:10.1093/nar/gkn1027
2. Martens DS, Van Der Stukken C, Derom C, Thiery E, Bijmens EM, Nawrot TS. Newborn telomere length predicts later life telomere length: Tracking telomere length from birth to child- and adulthood. *EBioMedicine.* (2021)63:103164. doi:10.1016/j.ebiom.2020.103164
3. Martens DS, Janssen BG, Bijmens EM et al. Association of Parental Socioeconomic Status and Newborn Telomere Length. *JAMA Netw Open.* (2020)3(5):e204057. doi:10.1001/jamanetworkopen.2020.4057
